# Supplementary material for: Efficient design and assembly of custom TALEN and other TAL effector-based constructs for DNA targeting
Source: PubMed Central journal article supplement — Nucleic Acids Res. 2011 Apr 14;39(12):e82. doi: 10.1093/nar/gkr218 (PMC3130291; doi:10.1093/nar/gkr218), 2011-04-14
Supplement: supp_gkr218_nar-00624-met-h-2011-File004.pdf [file supp_gkr218_nar-00624-met-h-2011-File004.pdf]

**Supplementary Table S1. Custom TALENs and target sites.**

| Gene         | Organism    | TAL1, TAL2 Plasmids   | TAL1, TAL2 Repeat number | Spacer | TAL1, TAL2 RVD Sequences                                                                                                                                                                                    | DNA Target Sequence with Spacer (TAL1, TAL2 underlined)                                                           |
|--------------|-------------|-----------------------|--------------------------|--------|-------------------------------------------------------------------------------------------------------------------------------------------------------------------------------------------------------------|-------------------------------------------------------------------------------------------------------------------|
| HPRT1 A      | Human       | pTAL141N,<br>pTAL142N | 17,20                    | 15     | TAL1: NN HD NI NG NI HD HD NG NI NI NG HD<br>NI NG NG NI NG<br>TAL2: HD HD NI NG NN NI NN NN NI NI NG NI<br>NI NI HD NI HD HD NG                                                                            | 5' - <u>GCATACCTAATCATTAT</u> GCTGAGGATTGGAA<br>AGGGTGTATTTCCTCATGG                                               |
| HPRT1 B      | Human       | pTAL143N,<br>pTAL144N | 20,17                    | 15     | TAL1: HD HD NI NG NG HD HD NG NI NG NN<br>NI HD NG NN NG NI NN NI NG<br>TAL2: NI NG NI HD NG HD NI HD NI HD NI<br>NI NG NI NN HD NG                                                                         | 5' - <u>CCATTCCTATGACTGTAGAT</u> TTTATCAGACTGAAG<br>AGCTATTGTGTGAGTAT                                             |
| CFTR A       | Human       | pTAL148N,<br>pTAL149N | 29,30                    | 28(25) | TAL1: NN NN NI NG NG NI NG NN HD HD NG NN<br>NN HD NI HD HD NI NG NG NI NI NI NN NI NI<br>NI NI NG<br>TAL2: NN NN HD NI NG NN HD NG NG NG NN NI<br>NG NN NI HD NN HD NG NG HD NG NN NG NI NG<br>HD NG NI NG | 5' - <u>GGATTATGCCTGGCACCATTAAAGAAAAT</u><br>ATCATCTTTGGTGTTCCTATGATGAAT<br><u>ATAGATACAGAAGCGTCATCAAAGCATGCC</u> |
| CFTR B       | Human       | pTAL150N,<br>pTAL151N | 23,28                    | 25(22) | TAL1: NN NN HD NI HD HD NI NG NG NI NI NI<br>NN NI NI NI NG NI NG HD NI NG<br>TAL2: NN NN HD NI NG NN HD NG NG NG NN NI<br>NG NN NI HD NN HD NG NG HD NG NN NG NI NG<br>HD NG                               | 5' - <u>GGCACCATTAAAGAAAATATCAT</u> CTTTGGTGTTCCTATGATGAATAT<br><u>AGATACAGAAGCGTCATCAAAGCATGCC</u>               |
| gridlock     | Zebrafish   | pTAL112,<br>pTAL117   | 17,16                    | 18     | TAL1: NI NG NG NG HD NN NI HD NN HD NG<br>HD NI NG NG HD NG<br>TAL2: HD HD HD NN NN NI NI NN HD HD NN NI<br>NG NN HD NG                                                                                     | 5' - <u>ATTTGACGCTCATTCT</u> CTGCCATGGACTTCTTG<br>AGCATCGGCTTCCGGG                                                |
| white        | Drosophila  | pTAL152N,<br>pTAL153N | 22,24                    | 24     | TAL1: HD HD NG NN NI HD HD NI NG NG HD NI<br>NG HD NI NN HD HD NN NG HD NG<br>TAL2: NN HD HD HD NG HD NN NN HD HD NI NG<br>HD NI NN NI NI NN NN NI NG HD NG NG                                              | 5' - <u>CCTGACCATTATCAGCCGTCT</u> TCCGAGCTGTTTGAGCTCTTTGAC<br>AAGATCCTTCTGATGGCCGAGGGC                            |
| GFP          | Jelly Fish  | pTAL156N,<br>pTAL157N | 26,25                    | 25     | TAL1: HD HD NI NG NN NN HD HD NI NI HD NI<br>HD NG NG NN NG HD NI HD NG NI HD NG NG NG<br>TAL2: NN HD HD NN HD NG NG HD NI NG NI NG<br>NN NI NG HD NG NN NN NN NG NI NG HD NG                               | 5' - <u>CCATGGCCAACACTTGTCACTACTTT</u><br>CTCTTATGGTGTCAATGCTTTTCA <u>AGATACCCAGATCATATGAAGCGGC</u>               |
| eGFP         | Jelly Fish  | pTAL158N,<br>pTAL159N | 24,26                    | 21     | TAL1: NI HD NI NI HD NG NI HD NI NI HD NI<br>NN HD HD NI HD NI NI HD NN NG HD NG<br>TAL2: HD NG NG NN NI NI NN NG NG HD NI HD<br>HD NG NG NN NI NG NN HD HD NN NG NG HD NG                                  | 5' - <u>ACAACACTACAACAGCCACAACGTCT</u> ATATCATGGCCGACAAGCAGA<br>AGAACGGCATCAAGGTGAACCTCAAG                        |
| Plasmepsin A | Plasmodium  | pTAL160N,<br>pTAL161N | 19,22                    | 15     | TAL1: HD NN HD NI NI NI NN NI NI NG NG NG<br>HD NG NG NG NI NI NG<br>TAL2: NI HD NI HD NN NN NN NI NI NI HD NG<br>NG NI NI HD NN NI NI NN NI NG                                                             | 5' - <u>CGCAAAGAATTTCTTTAAT</u> TCTAGATACAGGTTT<br>ATCTTCGTTAAGTTTCCCGTGT                                         |
| Plasmepsin B | Plasmodium  | pTAL162N,<br>pTAL163N | 23,24                    | 15     | TAL1: NI NG NG NI NG NG NN NN HD HD NG NG<br>NI NI HD HD NI NG NI HD NG HD NG<br>TAL2: HD HD NI NG NN NG NI NI NI NI HD NI<br>NG NG NG NG NG HD NG NN NI HD NI NG                                           | 5' - <u>ATTATTGGCCTTAACCATACTCT</u> TATCTCTTATTCTTT<br>ATGTCAGAAAAATGTTTTACATGG                                   |
| TT4 A        | Arabidopsis | pTAL164N,<br>pTAL165N | 19,22                    | 15     | TAL1: HD HD NI NG HD NG HD HD NG HD NI NI<br>NN NN NI NG NN NG NG<br>TAL2: HD NG NI NN NI HD NG HD NG NG HD NI                                                                                              | 5' - <u>CCATCTCCTCAAGGATGTT</u> CCCGGCTCATCTCC<br>AAGAACATTGTGAAGTCTAG                                            |

|        |             |                       |       |    |                                                                                                                                        |                                                                                     |
|--------|-------------|-----------------------|-------|----|----------------------------------------------------------------------------------------------------------------------------------------|-------------------------------------------------------------------------------------|
|        |             |                       |       |    | HD NI NI NG NN NG NG HD NG NG                                                                                                          |                                                                                     |
| TT4 B  | Arabidopsis | pTAL166N,<br>pTAL167N | 15,16 | 15 | TAL1: NN NG HD NN NG HD NG NG HD NG NN HD<br>NI HD NG<br>TAL2: NI NN NG HD NI NN HD NI HD HD NI NN<br>NN HD NI NG                      | 5'- <u>GTCGTCTTCTGCACT</u> <u>ACCTCCGGCGTCGAC</u> <u>ATGCCTGGTGCTGACT</u>           |
| ADH1   | Arabidopsis | pTAL 69N,<br>pTAL 74N | 15,15 | 18 | TAL1: HD HD NN NN NI NG NN HD NG HD HD NG<br>HD NG NG<br>TAL2: NI NN NI HD NI NI NI HD HD NI HD NI<br>NI HD NG                         | 5'-<br><u>CCGGATGCTCCTCTT</u> <u>GACAAGGTCTGTATTGTC</u> <u>AGTTGTGGTTTGTCT</u>      |
| SuRB A | Tobacco     | pZHY096<br>pZHY106    | 17,20 | 15 | TAL1: NI HD NG NN NI NI NG NI NI NG HD NI<br>NI HD NI HD NG<br>TAL2: NI NG NI NN NI NI HD HD NN NI NG HD<br>HD NG HD HD HD NI NG NG    | 5'- <u>ACTGAATAATCAACACT</u> <u>TGGGAATGGTGGTTC</u><br><u>AATGGGAGGATCGGTTCTAT</u>  |
| SuRB B | Tobacco     | pZHY108<br>pZHY109    | 19,19 | 15 | TAL1: NI HD HD NG HD NI NG HD NI NN NN NI<br>NI HD NI NG NN NG NG<br>TAL2: HD NG NG NG NN NI NI NI NN HD HD<br>HD HD NN HD HD NI HD NG | 5'- <u>ACCTCATCAGGAACATGTT</u> <u>CTACCTATGATTCCC</u><br><u>AGTGGCGGGGCTTTCAAAG</u> |

**Supplementary Table S2. Activity, conformity to rules, and length of TALENs tested in the yeast assay.** Activity: – no activity, + activity less than 25% of ZFN Zif268, ++ activity 25-50% of ZFN Zif268, +++ activity 50-75% ZFN Zif268, ++++ activity >75% ZFN Zif268.

| TALEN     | RVDs | Activity | % GATC | Ends in NG | RVD Sequence                                       |
|-----------|------|----------|--------|------------|----------------------------------------------------|
| ADH1_1R12 | 12   | -        | y      | n          | HD HD HD NI NN NI NI NN NG NI NI NI                |
| ADH1_2R12 | 12   | -        | n      | n          | NI NN NI HD NI NI NI HD HD NI HD NI                |
| tt4_1L15  | 15   | -        | y      | y          | NN NN HD NI HD NG NN HD NG NI NI HD HD HD NG       |
| telo_1R15 | 15   | -        | n      | y          | HD NN NN NG NG NG NN HD NG NI NG HD NN NG NG       |
| ADH1_1R15 | 15   | +        | y      | y          | HD HD HD NI NN NI NI NN NG NI NI NI HD NI NG       |
| ADH1_2L12 | 12   | +        | y      | y          | HD HD NN NN NI NG NN HD NG HD HD NG                |
| grid_1R10 | 10   | +        | n      | n          | NI HD HD HD HD NG HD NG HD HD                      |
| telo_1L15 | 15   | +        | y      | y          | HD NG NG NN NG HD HD NN HD NI NG NN NI NG NG       |
| telo_2L16 | 16   | +        | y      | y          | NI NG NG HD HD HD HD NI HD NN NI NN HD NG HD NG    |
| telo_2R17 | 17   | +        | n      | y          | NI NN NI HD NI NN NN NI NI NN NG NN NN NI NN HD NG |
| ADH1_1L12 | 12   | ++       | y      | n          | NI NG HD NI NI NN NI NG NG HD NG HD                |
| ADH1_2R15 | 15   | ++       | y      | y          | NI NN NI HD NI NI NI HD HD NI HD NI NI HD NG       |
| grid_1R13 | 13   | ++       | y      | y          | NI HD HD HD HD NG HD NG HD HD NN HD NG             |
| ADH1_2L15 | 15   | +++      | y      | y          | HD HD NN NN NI NG NN HD NG HD HD NG HD NG NG       |
| grid_1L16 | 16   | ++++     | y      | y          | NI HD HD HD HD NG HD NG HD HD NN HD NG NG HD NG    |

## Module

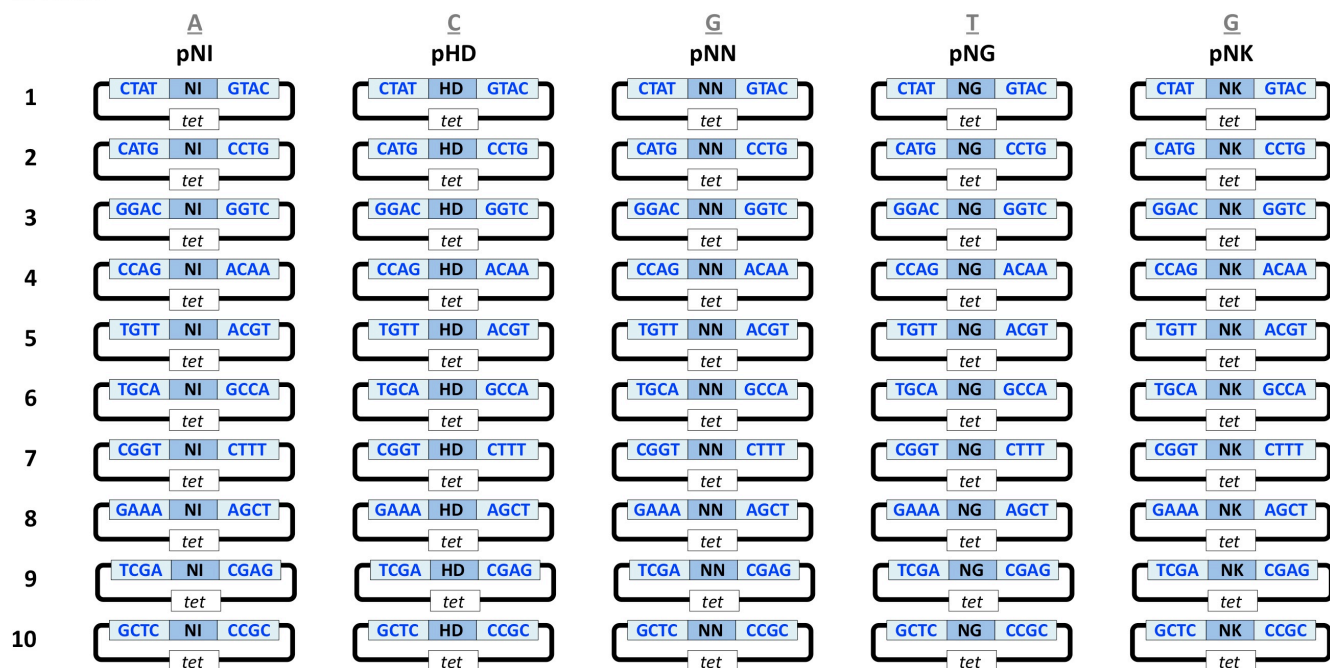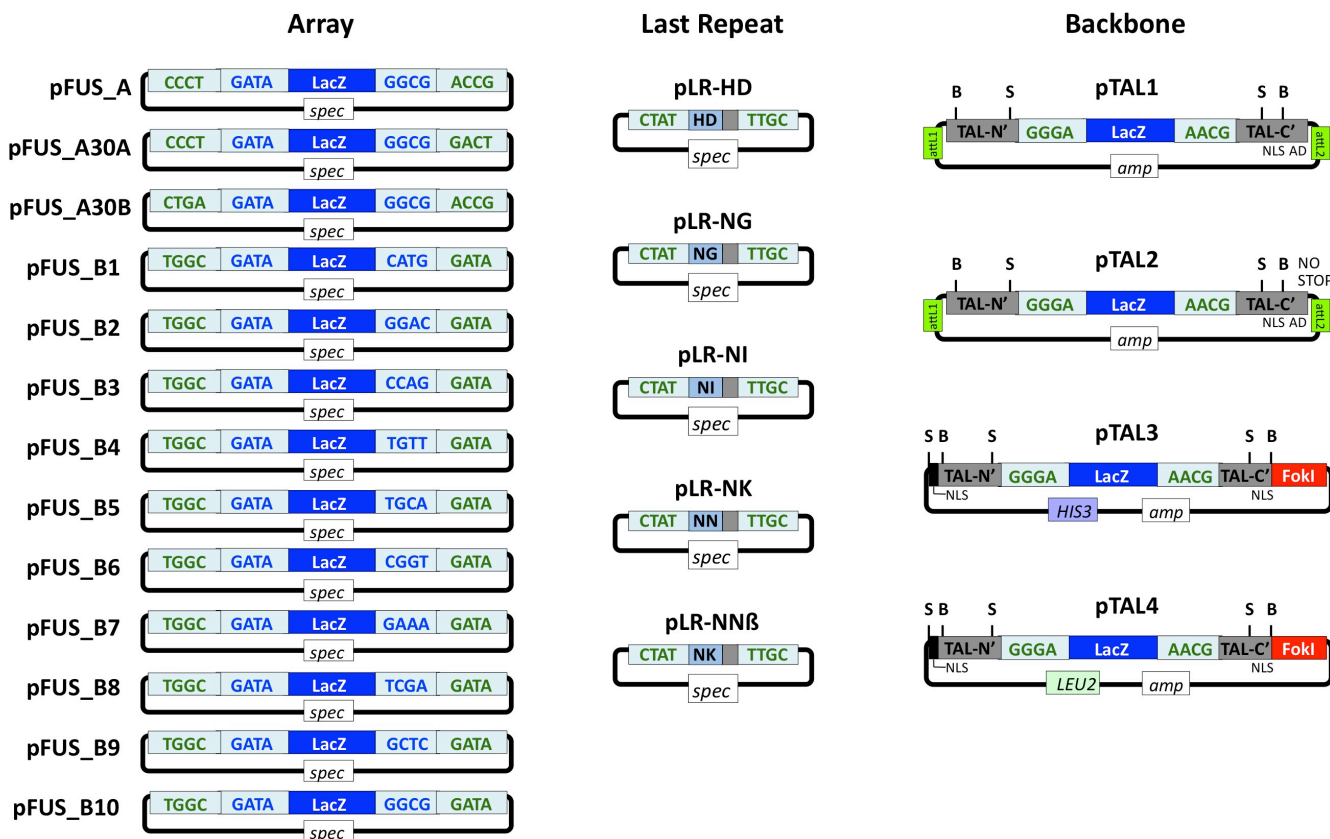

**Fig. S1. Module, array, last repeat, and backbone plasmids.** Overhangs left by *Bsa*I digestion are shown in blue font and by *Esp*3I in green. HD modules 2-10 contain a *Bsp*EI site (not shown) not present in the other modules. NLS, nuclear localization signal(s); AD, transcriptional activation domain; *tet*, tetracycline; *spec*, spectinomycin; *amp*, ampicillin; attL1 and attL2, recombination sites for Gateway cloning; B, *Bam*HI, and S, *Sph*I. Unique restriction enzyme sites flanking the entire coding sequences of the backbone constructs are not shown but can be found in the sequence files.

a

gglabx.plp.iastate.edu/TALENT/

from ... Gramene Rice Genome Annot... The R Project for St... Welcome to BioCon... Python Program

NG Image, 641x106 pixels) HTML Color Picker Find Engineered TAL Sites Python Program

# TALE-NT

TAL Effector-Nucleotide Targeter

Home | Help | About

**Enter FASTA sequences**  
 Enter up to 5000 total bases.  
 (e.g. You may have 1 sequence of 5k bases, 5 sequences with 1k bases, or any such combinations)

```
>HPRT1_sequence
CTACAGGCATGTGTCCACACACCCGGCTAATTTTTTGTATTTTTAGTAGAGCGGGATTCACCGTGT
GCCAGGCTGTCTCGAATCCTGAGCTCAGGCAGTCTGCCTCAGCTCCCAAGTCTGGGATTA
CAGCTGTGAACCAACCCCGCCGCTGTTGTTTTCTACATAATTCATTATCATACCTACAAAGTAAACA
GTTACTAATCATCTTACACCTAAATTTCTCTGATAGACTAAGGTATTTTTAACATCTTAATCCAAT
CAAAATGTTGTATCCTTAATGCTCTCATTGAACAGCTATATTTCTTTTCAGATTAGTGATGATGAAC
CAGGTATGACCTTGATTTATTTGATACCTAATGATGCTGAGGATTTGGAAAGGGTGTATTCC
TCATGGACTAATATGGACAGGTAAGTAAGTCTTAAAATGAGGTTTTTACTTTTCTTGTTAATTT
CAAAATCAGGAGCTGTTCTGAGTACTTGTCTTGAACATAAAGTGGCCAACTTAAATAACTGAT
GCTTTCTAAAATGCTTTTATTTAAAATAAAAGAGGGGCTTACTAATTAATTAATTAATTAATTAAT
ATAGTGGACTCTGTAGGACCAAGCAAAAGTAAACATTTAAGGGAGATGGAAGAGGACTCTAGCCAG
AGTCTTGATTTCTCAGTCTAAACAGGGTAATGACTGGGCTGAATCACTAAAGGCAAGGTGAGATT
TTTATTATTGCACATCTAGCTGAAATTTTTCTGTTAAGTCAATTACAGTGAACAACTTACTGCTGTA
TTGAATGCTGCATTGTATGCTGCCTATTCTGTGTTTTTAAATTAATAATCAAATATTTGT
GTTATAAAATTTCTAACTATGGAGCCATAAACAAGAACTAAAGTCTCTCTTTCAGCCTTCTGTA
CACATTTCTCTCAAGCACTGGCTGATGTACTACTATGAAAAGTACATATATACATTTATATTT
AACGTATGAGTATAGTTTTAAATGTTATTGGACACTTTTAAATTTAGTGTCTAGAGCTATCAATATA
TTTTAAAGGTTGCATAGCATTCTGTTTAAAGGATACCATAACTGATTTAAACAGTCACTATTGATAG
ACACTATTTTGTCTTACCAGCTGTACTAGAAGAAACATTCTTTACATGTTTGGTACTTGTTCAGCTTT
ATTCAAGTGAATTTCTGGTCAAGGGGAAAGATTTTGAATATTTGTTGATTTGCCAATTTCTCTCT
AAGAAGTTGAATCATTATCTCCTGATGTTATGAGAGTACCTTCTTCCAAATTTGTCTTTCT
```

Spacer  Min  Max  
 (Default spacers are 15, 18-30 bases. Check this option to enter a min and max to search a range of spacer sizes)

Require A, C, or G at position 1 (not a T)  
 Require C, G, or T at position 2 (not an A)  
 Require a T at position N  
 Allow sites to end in G  
 Percent composition

b

1295645253\_TALEN\_pairs\_all.txt - OpenOffice.org Calc

|    | A              | B         | C         | D        | E        | F             | G                                                  | H                                                     | I                             |                      |
|----|----------------|-----------|-----------|----------|----------|---------------|----------------------------------------------------|-------------------------------------------------------|-------------------------------|----------------------|
| 1  | Gene           | TAL1_star | TAL2_star | TAL1_len | TAL2_len | Spacer_length | Spacer_range                                       | Perfect_TAL1                                          | Perfect_TAL2                  | Plus_strand_sequence |
| 2  | HPRT1_sequence | 374       | 442       | 15       | 28       | 26389-414     | NN HD NI NG NI HD HD NG NI NI NG HD NI NG NG NG    | NI HD HD NG NN NG HD HD NI NG NI NI NG NG NI NN NG    | HPGCATACCTAATCATTATGCTGAGGATT | ATGCTGAGGATT         |
| 3  | HPRT1_sequence | 374       | 425       | 17       | 20       | 15391-405     | NN HD NI NG NI HD HD NG NI NI NG HD NI NG NG NI NG | HD HD NI NG NN NI NN NN NI NI NG NI NI NI HD NI HD HD | HPGCATACCTAATCATTATGCTGAGGATT | GCTGAGGATT           |
| 4  | HPRT1_sequence | 374       | 428       | 17       | 23       | 15391-405     | NN HD NI NG NI HD HD NG NI NI NG HD NI NG NG NI NG | NI NN NG HD HD NI NG NN NI NN NN NI NI NI NI NI HD    | HPGCATACCTAATCATTATGCTGAGGATT | GCTGAGGATT           |
| 5  | HPRT1_sequence | 374       | 436       | 17       | 22       | 24391-414     | NN HD NI NG NI HD HD NG NI NI NG HD NI NG NG NI NG | HD HD NI NG NI NI NG NG NI NN NG HD HD NI NG NN NI    | HPGCATACCTAATCATTATGCTGAGGATT | GCTGAGGATT           |
| 6  | HPRT1_sequence | 374       | 438       | 17       | 24       | 24391-414     | NN HD NI NG NI HD HD NG NI NI NG HD NI NG NG NI NG | NN NG HD HD NI NG NI NI NG NG NI NN NG HD HD NI NG    | HPGCATACCTAATCATTATGCTGAGGATT | GCTGAGGATT           |
| 7  | HPRT1_sequence | 374       | 442       | 17       | 28       | 24391-414     | NN HD NI NG NI HD HD NG NI NI NG HD NI NG NG NI NG | NI HD HD NG NN NG HD HD NI NG NI NI NG NG NI NN NG    | HPGCATACCTAATCATTATGCTGAGGATT | GCTGAGGATT           |
| 8  | HPRT1_sequence | 374       | 436       | 20       | 22       | 21384-414     | NN HD NI NG NI HD HD NG NI NI NG HD NI NG NG NI NG | NI HD HD NG NN NG HD HD NI NG NI NI NG NG NI NN NG    | HPGCATACCTAATCATTATGCTGAGGATT | GCTGAGGATT           |
| 9  | HPRT1_sequence | 374       | 438       | 20       | 24       | 21384-414     | NN HD NI NG NI HD HD NG NI NI NG HD NI NG NG NI NG | NN HD HD NI NG NI NI NG NG NI NN NG HD HD NI NG NI    | HPGCATACCTAATCATTATGCTGAGGATT | GCTGAGGATT           |
| 10 | HPRT1_sequence | 374       | 442       | 20       | 28       | 21384-414     | NN HD NI NG NI HD HD NG NI NI NG HD NI NG NG NI NG | HD HD NG NN NG HD HD NI NG NI NI NG NG NI NN NG       | HPGCATACCTAATCATTATGCTGAGGATT | GCTGAGGATT           |
| 11 | HPRT1_sequence | 374       | 436       | 20       | 15       | 28394-421     | NN HD NI NG NI HD HD NG NI NI NG HD NI NG NG NI NG | NI HD HD NG NN NG HD HD NI NG NI NI NG NG NI NN NG    | GCATACCTAATCATTATGCTGAGGATT   | GAGGATT              |
| 12 | HPRT1_sequence | 374       | 438       | 20       | 17       | 28394-421     | NN HD NI NG NI HD HD NG NI NI NG HD NI NG NG NI NG | NN NN NG HD HD NI NG NI NI NG NG NI NN NG HD HD NI NG | GCATACCTAATCATTATGCTGAGGATT   | GAGGATT              |
| 13 | HPRT1_sequence | 374       | 442       | 20       | 21       | 28394-421     | NN HD NI NG NI HD HD NG NI NI NG HD NI NG NG NI NG | NI HD HD NG NN NG HD HD NI NG NI NI NG NG NI NN NG    | HPGCATACCTAATCATTATGCTGAGGATT | GAGGATT              |
| 14 | HPRT1_sequence | 374       | 446       | 20       | 25       | 28394-421     | NN HD NI NG NI HD HD NG NI NI NG HD NI NG NG NI NG | NI HD HD NG NN NG HD HD NI NG NI NI NG NG NI NN NG    | HPGCATACCTAATCATTATGCTGAGGATT | GAGGATT              |
| 15 | HPRT1_sequence | 374       | 449       | 20       | 28       | 28394-421     | NN HD NI NG NI HD HD NG NI NI NG HD NI NG NG NI NG | NI HD HD NG NN NG HD HD NI NG NI NI NG NG NI NN NG    | HPGCATACCTAATCATTATGCTGAGGATT | GAGGATT              |
| 16 | HPRT1_sequence | 374       | 436       | 26       | 22       | 15400-414     | NN HD NI NG NI HD HD NG NI NI NG HD NI NG NG NI NG | NI HD HD NG NN NG HD HD NI NG NI NI NG NG NI NN NG    | HPGCATACCTAATCATTATGCTGAGGATT | T                    |
| 17 | HPRT1_sequence | 374       | 438       | 26       | 24       | 15400-414     | NN HD NI NG NI HD HD NG NI NI NG HD NI NG NG NI NG | NI HD HD NG NN NG HD HD NI NG NI NI NG NG NI NN NG    | HPGCATACCTAATCATTATGCTGAGGATT | T                    |
| 18 | HPRT1_sequence | 374       | 442       | 26       | 28       | 15400-414     | NN HD NI NG NI HD HD NG NI NI NG HD NI NG NG NI NG | NI HD HD NG NN NG HD HD NI NG NI NI NG NG NI NN NG    | HPGCATACCTAATCATTATGCTGAGGATT | T                    |
| 19 | HPRT1_sequence | 374       | 436       | 26       | 15       | 22400-421     | NN HD NI NG NI HD HD NG NI NI NG HD NI NG NG NI NG | NI HD HD NG NN NG HD HD NI NG NI NI NG NG NI NN NG    | GCATACCTAATCATTATGCTGAGGATT   | T                    |
| 20 | HPRT1_sequence | 374       | 438       | 26       | 17       | 22400-421     | NN HD NI NG NI HD HD NG NI NI NG HD NI NG NG NI NG | NI HD HD NG NN NG HD HD NI NG NI NI NG NG NI NN NG    | GCATACCTAATCATTATGCTGAGGATT   | T                    |
| 21 | HPRT1_sequence | 374       | 442       | 26       | 21       | 22400-421     | NN HD NI NG NI HD HD NG NI NI NG HD NI NG NG NI NG | NI HD HD NG NN NG HD HD NI NG NI NI NG NG NI NN NG    | HPGCATACCTAATCATTATGCTGAGGATT | T                    |
| 22 | HPRT1_sequence | 374       | 446       | 26       | 25       | 22400-421     | NN HD NI NG NI HD HD NG NI NI NG HD NI NG NG NI NG | NI HD HD NG NN NG HD HD NI NG NI NI NG NG NI NN NG    | HPGCATACCTAATCATTATGCTGAGGATT | T                    |
| 23 | HPRT1_sequence | 374       | 449       | 26       | 28       | 22400-421     | NN HD NI NG NI HD HD NG NI NI NG HD NI NG NG NI NG | NI HD HD NG NN NG HD HD NI NG NI NI NG NG NI NN NG    | HPGCATACCTAATCATTATGCTGAGGATT | T                    |
| 24 | HPRT1 sequence | 374       | 442       | 26       | 17       | 26400-425     | NN HD NI NG NI HD HD NG NI NI NG HD NI NG NG NI NG | NI HD HD NG NN NG HD HD NI NG NI NI NG NG NI NN NG    | GCATACCTAATCATTATGCTGAGGATT   | T                    |

**Fig. S2. The TAL Effector-Nucleotide Targeter.** (a) Screenshot showing the DNA sequence input window and options to include or exclude specific guidelines and to specify spacer lengths. (b) Sample output for the human *HPRT1* gene showing candidate target sequences and corresponding TALEN RVD sequences. Highlighted in the top row is the *HPRT1* A (Fig. 5) target site information. The targeter URL is [boglabx.plp.iastate.edu/TALENT/](http://boglabx.plp.iastate.edu/TALENT/).

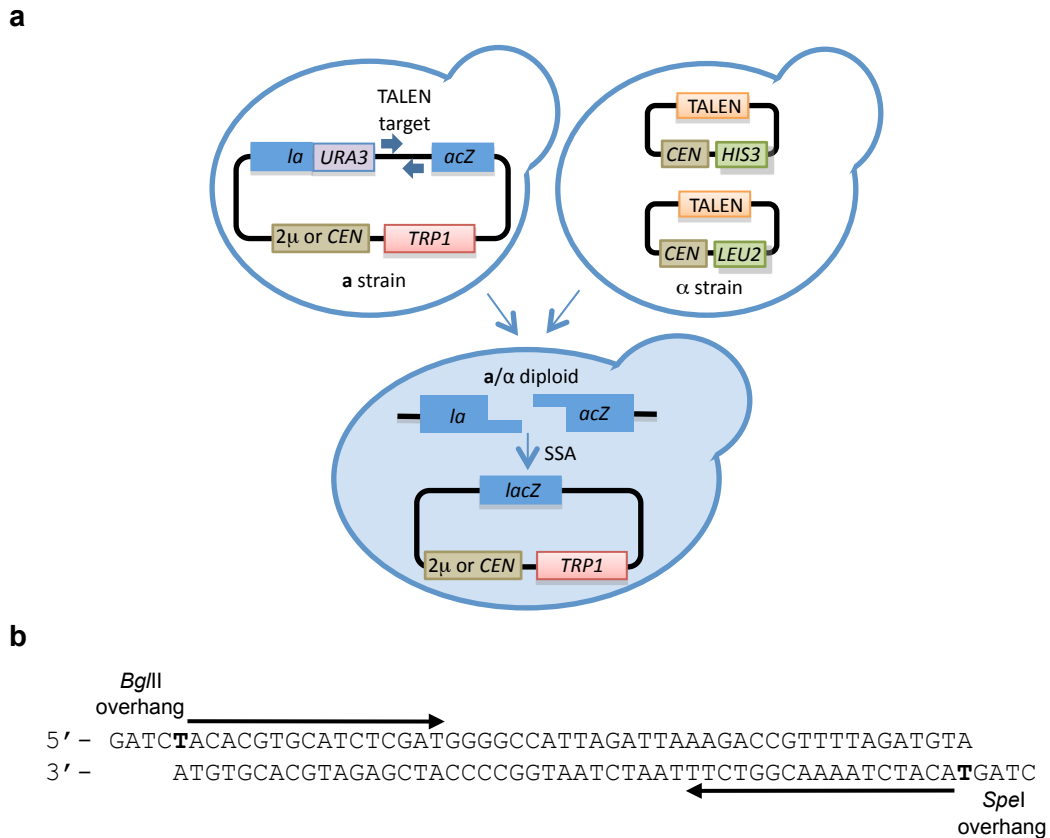

**Fig. S3.** The yeast assay for testing TALEN function. (a) Schematic of the assay (see text for details). SSA, single-strand annealing. (b) Example of target site oligonucleotides that are synthesized, annealed and cloned into the target plasmid pCP5. Arrows indicate the opposing TALEN monomer binding sites, separated by a spacer. The T preceding each site is in bold.
